# Supplementary material
Source: MDPI journal article supplement (https://www.mdpi.com/2673-9992/12/1/21)
Supplement: s1 [file s1]

# Structure-activity relationship for natural tetracenomycin X congeners

Vera A. Alferova<sup>1,2</sup>, Tinashe P. Maviza<sup>3</sup>, Mikhail V. Biryukov<sup>2,4,5</sup>, Yuliya V. Zakalyukina<sup>4,5</sup>, Dmitrii A. Lukianov<sup>3</sup>, Dmitry A. Skvortsov<sup>4</sup>, Lilia A. Vasilyeva<sup>4</sup>, Vadim N. Tashlitsky<sup>4</sup>, Vladimir I. Polshakov<sup>4</sup>, Petr V. Sergiev<sup>3,4</sup>, Ilya A. Osterman<sup>3,4,5</sup>, Vladimir A. Korshun<sup>1,2</sup>

1 Shemyakin-Ovchinnikov Institute of Bioorganic Chemistry, Miklukho-Maklaya 16/10, Moscow 117997, Russia

2 Gause Institute of New Antibiotics, Bolshaya Pirogovskaya 11, Moscow 119021, Russia

3 Center of Life Sciences, Skolkovo Institute of Science and Technology, Skolkovo, 143028, Russia

4 Moscow State University, GSP-1, Leninskie Gory, Moscow 119991, Russia

5 Genetics and Life Sciences Research Center, Sirius University of Science and Technology, Sochi, 354340, Russia

email: alferovava@gmail.com

## Tetracenomycin antibiotic family

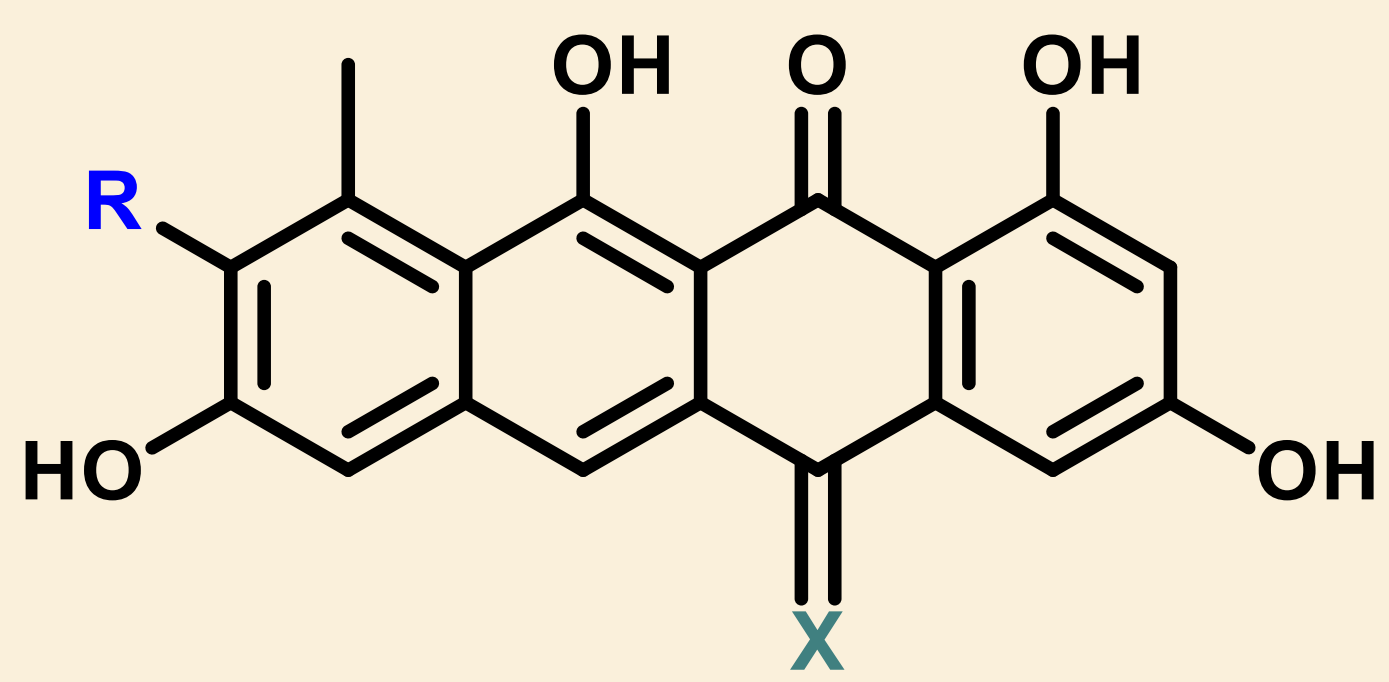

R = CO<sub>2</sub>Me, X = O, tetracenomycin A2

R = H, X = O, tetracenomycin D

R = CO<sub>2</sub>H, X = H<sub>2</sub>, tetracenomycin F1

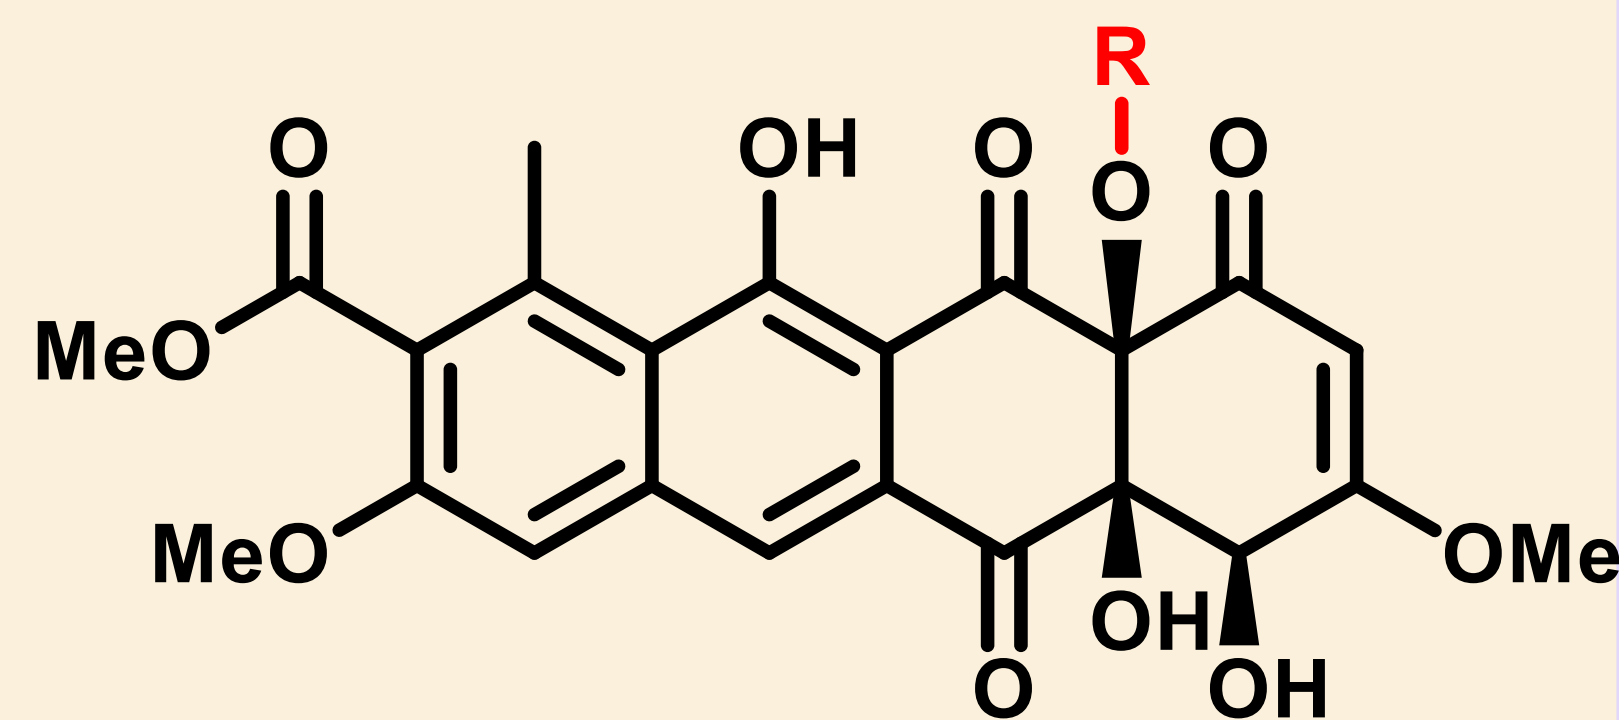

R = H, tetracenomycin C

R = Me, tetracenomycin X

**Tetracenomycins (Tcm)** are aromatic polyketides with four fused rings.

Despite structural similarity, only TcmX and TcmC have distinctive 4a,12a-deoxygenation dramatically disrupting the planar structure.

Recently TcmX was shown to have the **unique binding site in the large ribosomal subunit**.

## Isolation of the novel natural teracenomycins

*Amycolatopsis* sp. strain A23

**Cultivation**

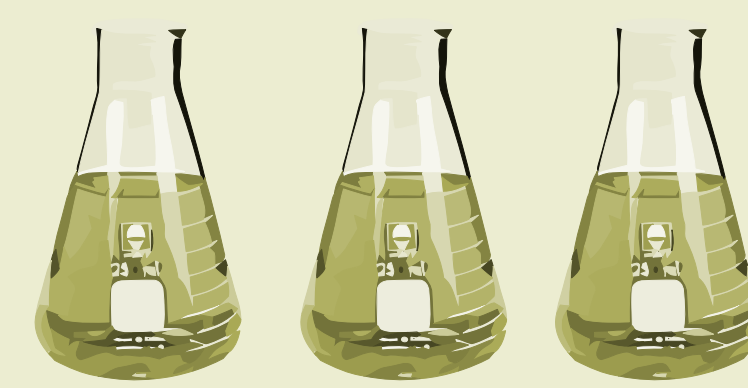

**Extraction**

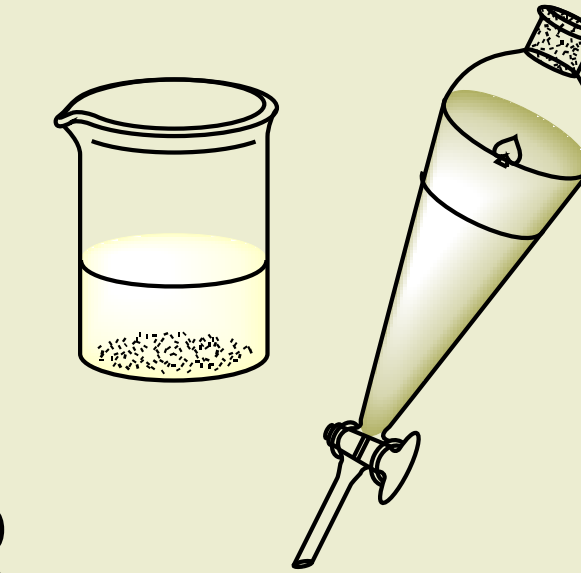

**Chromatography**

2 novel Tcm congeners

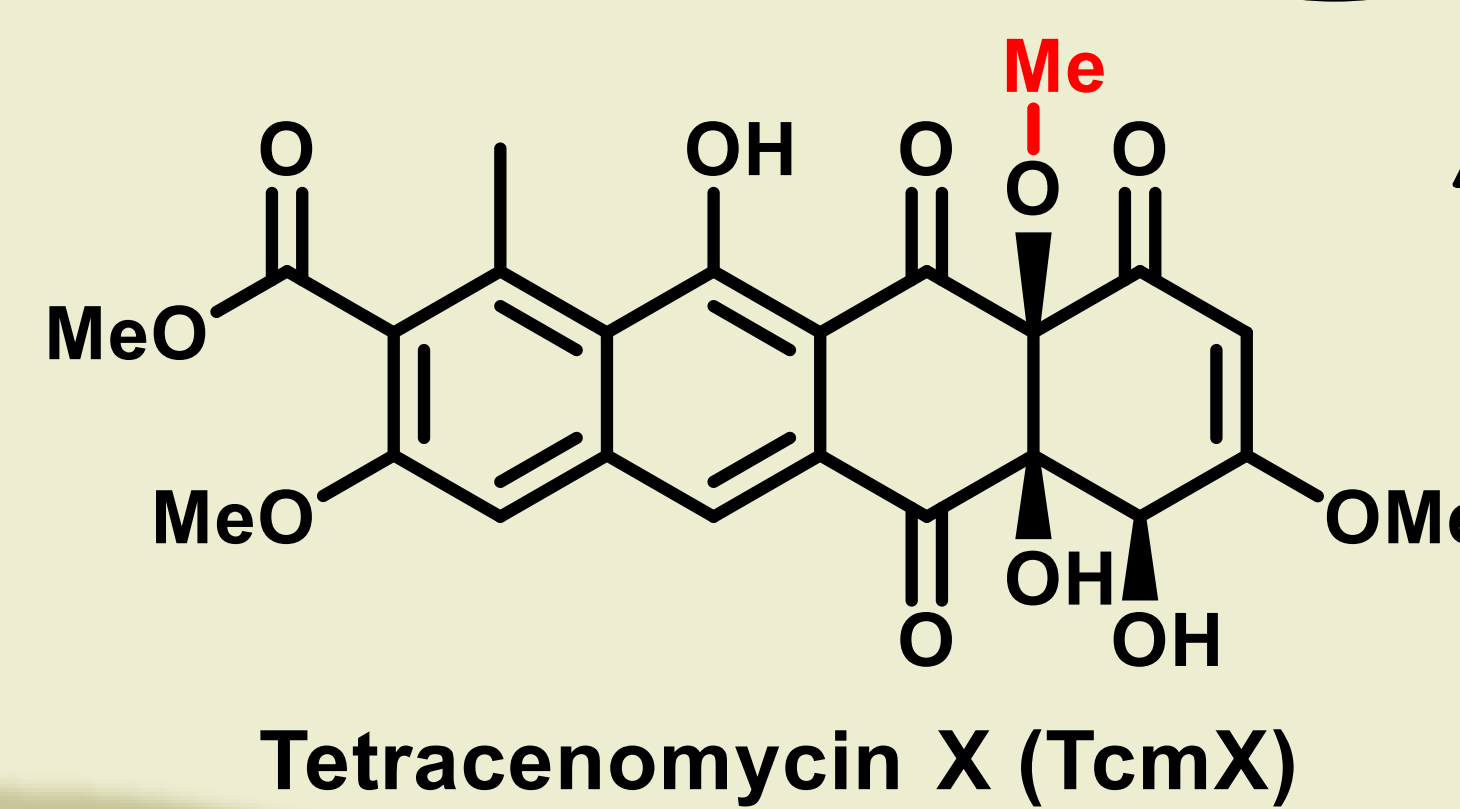

Tetracenomycin X (TcmX)

this work

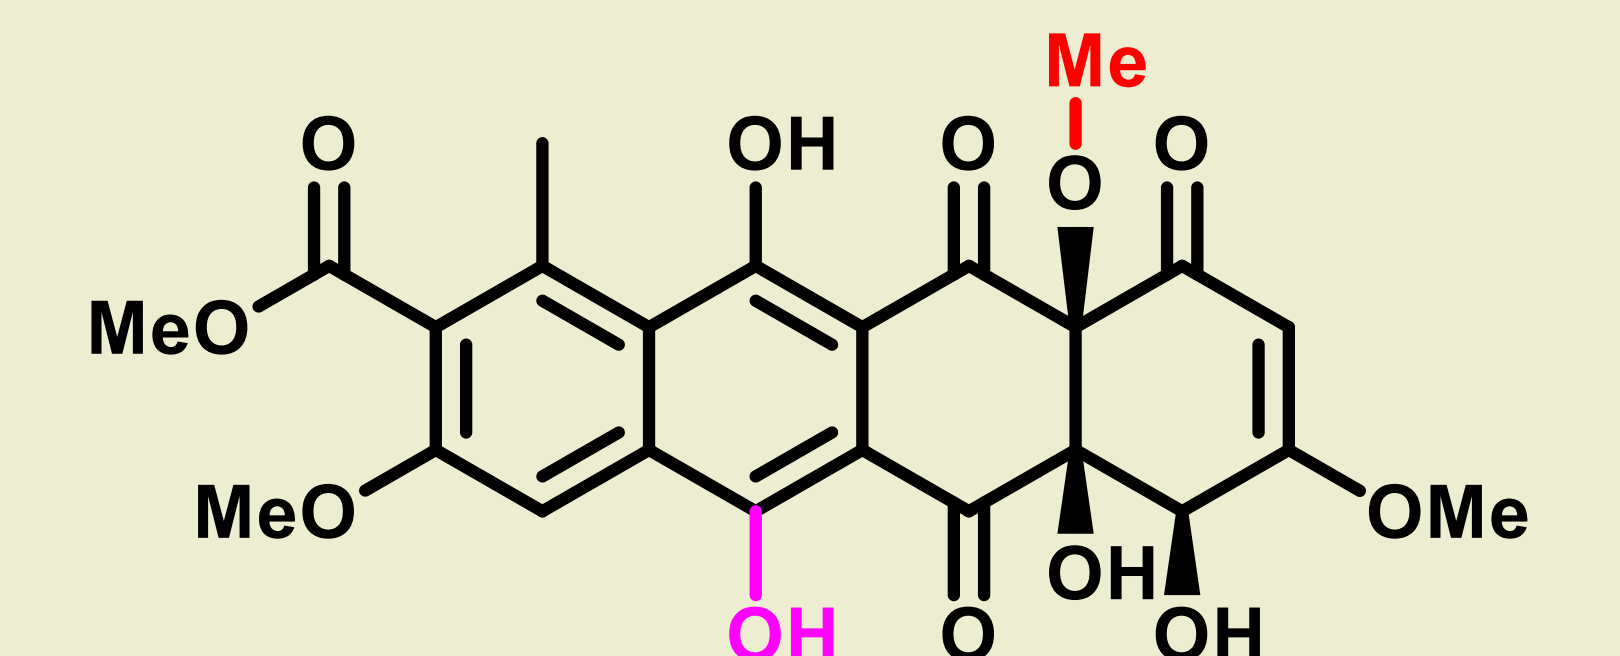

6-OH-Tetracenomycin X (6-OH-TcmX)

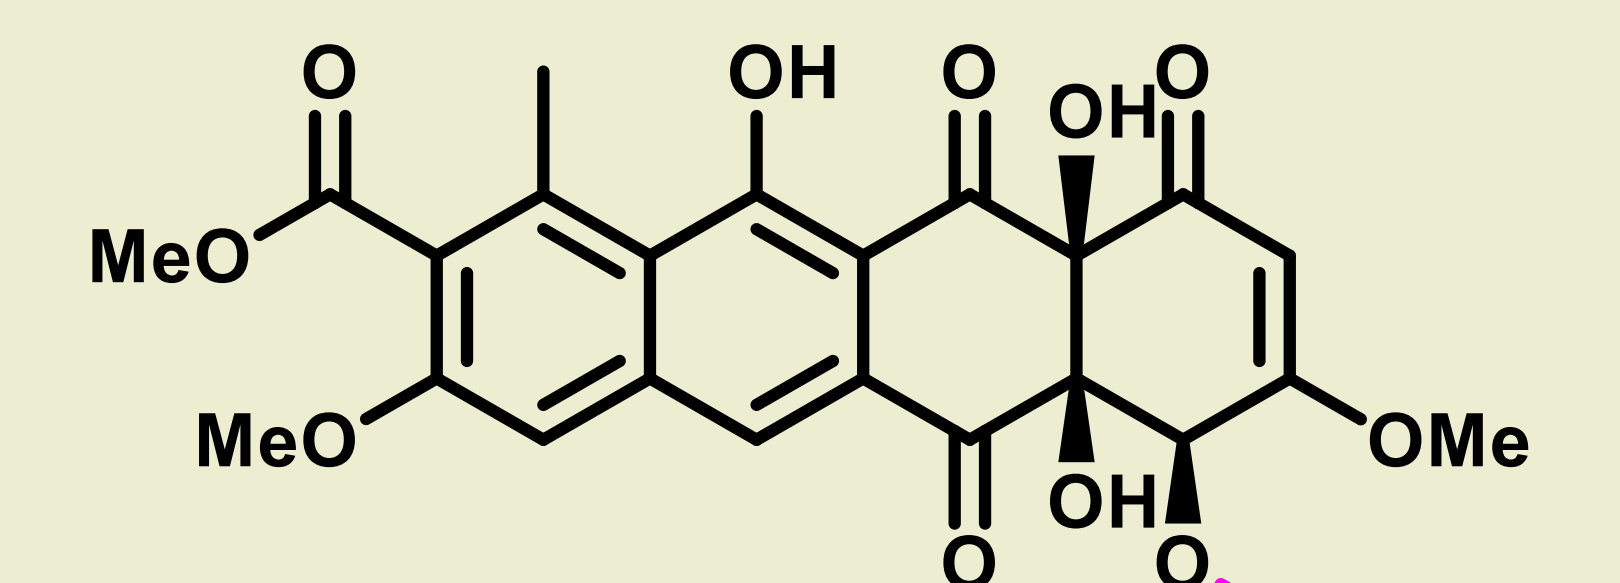

O<sup>4</sup>-Me-Tetracenomycin C (O<sup>4</sup>-Me-TcmC)

STATE OF ART

STRUCTURE ELUCIDATION

## Antibacterial properties

### Translation inhibition

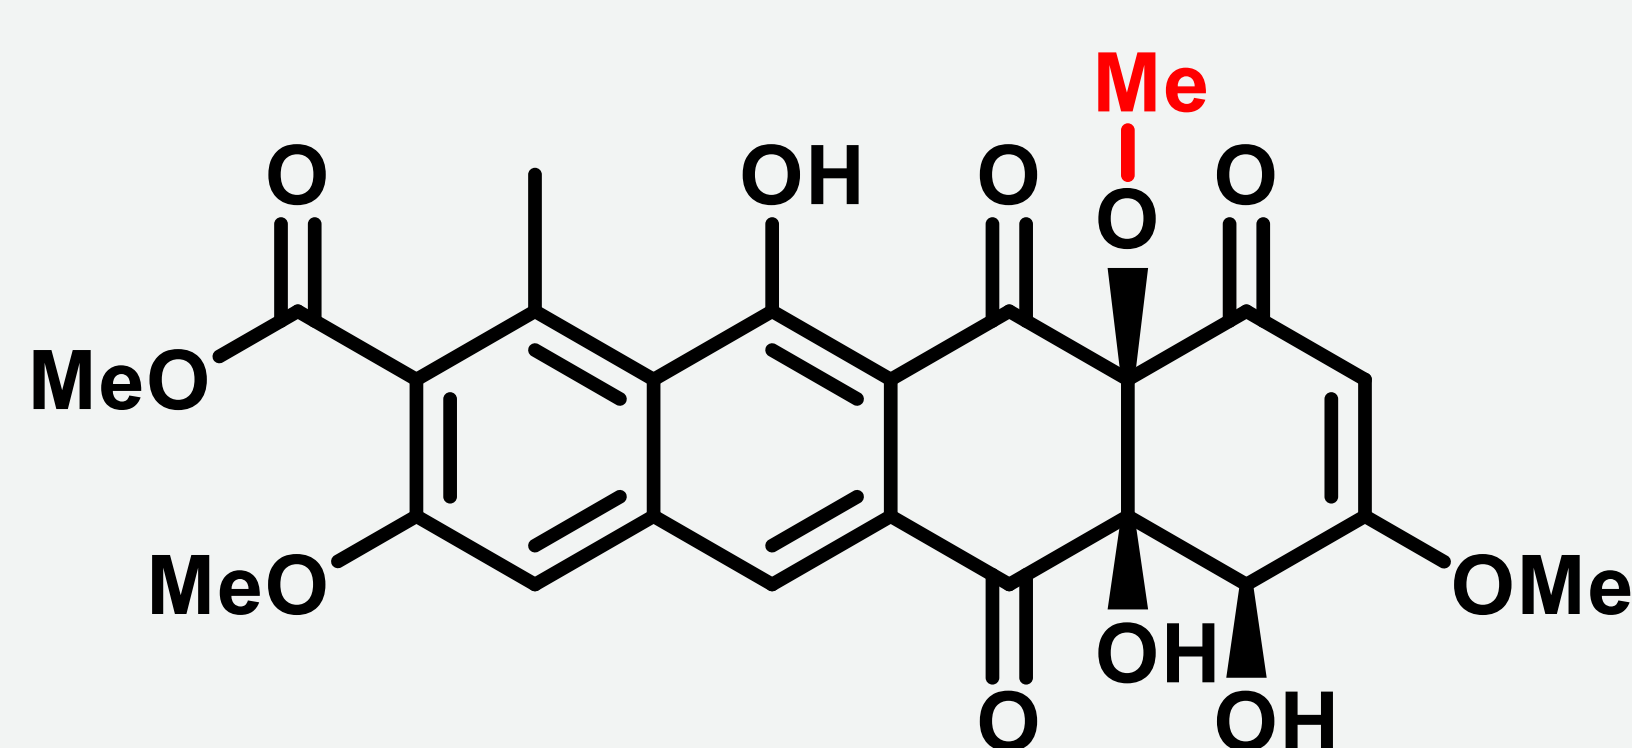

TcmX

2020.Nat.Chem.Biol. 16.1071-1077

High antibacterial activity  
Potent translation inhibition

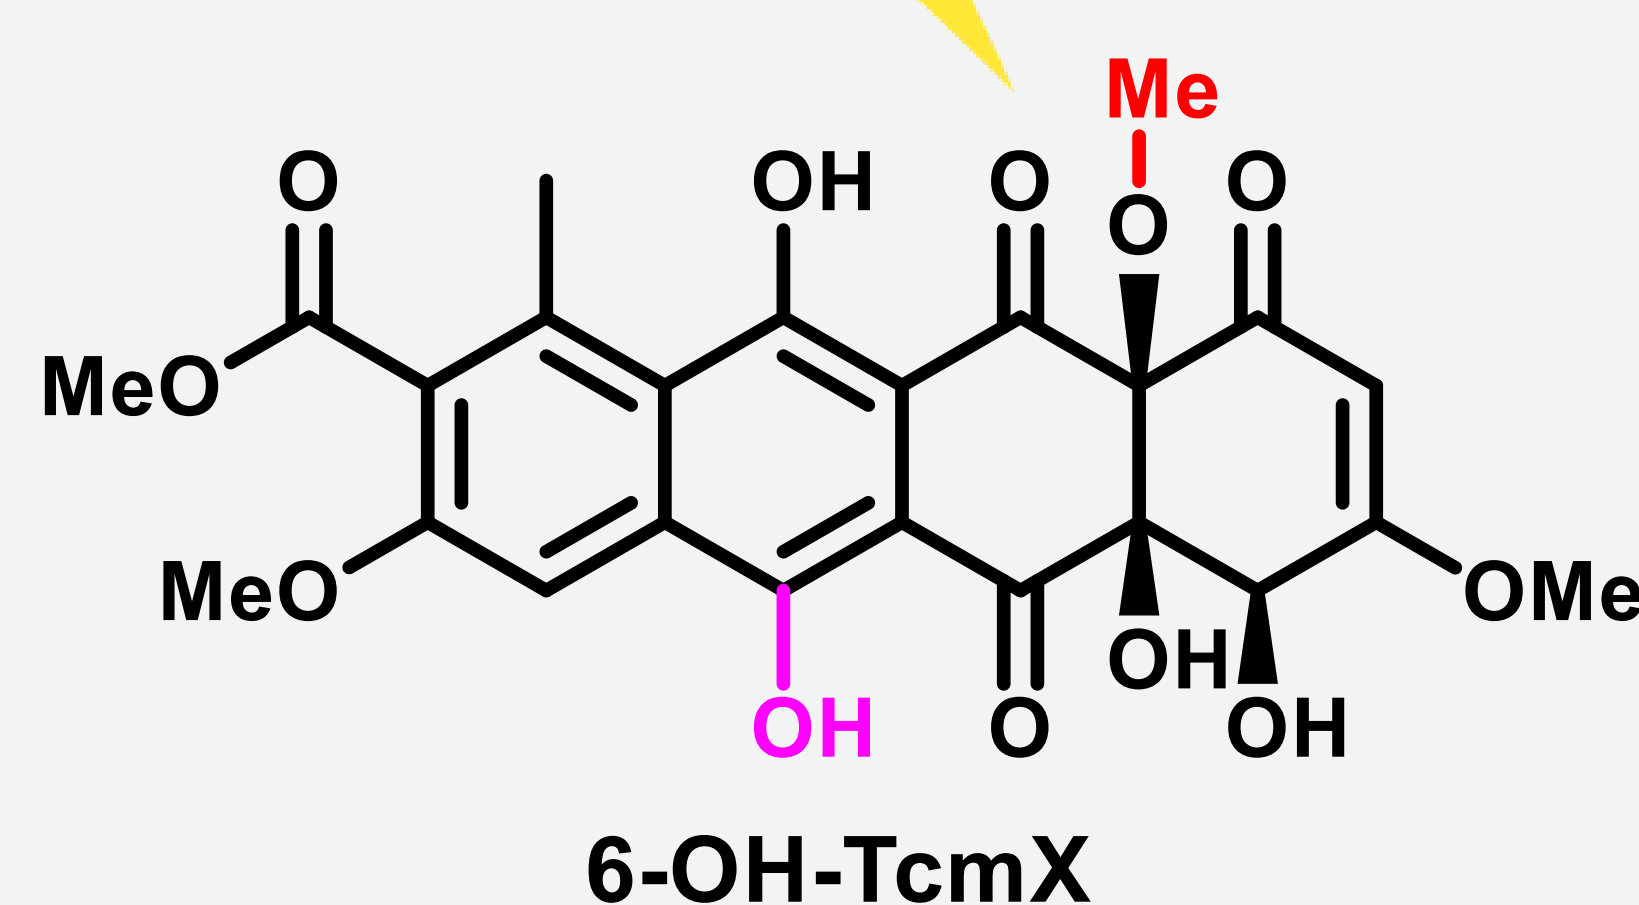

6-OH-TcmX

Reduced antibacterial activity  
Potent translation inhibition

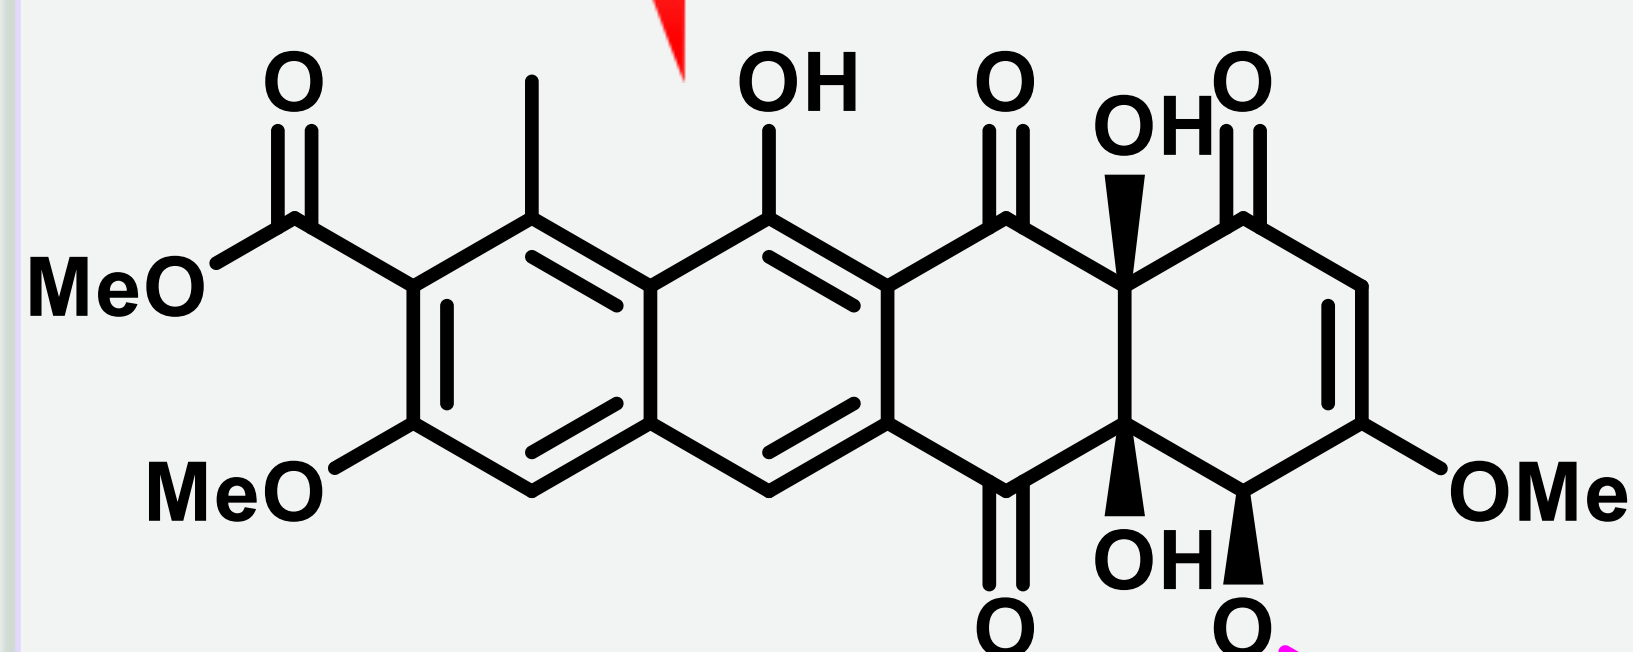

O<sup>4</sup>-Me-TcmC

Inactive  
No translation inhibition

6-hydroxylation impairs activity of 6-OH-TcmX, but **does not interfere with key target interaction sites**

BIOLOGICAL EVALUATION

RIBOSOME BINDING

## Schematic map on the ribosome

O<sup>4</sup>-Me-TcmC fit to cryo-EM TcmX-70S ribosome (PDB 6Y69)

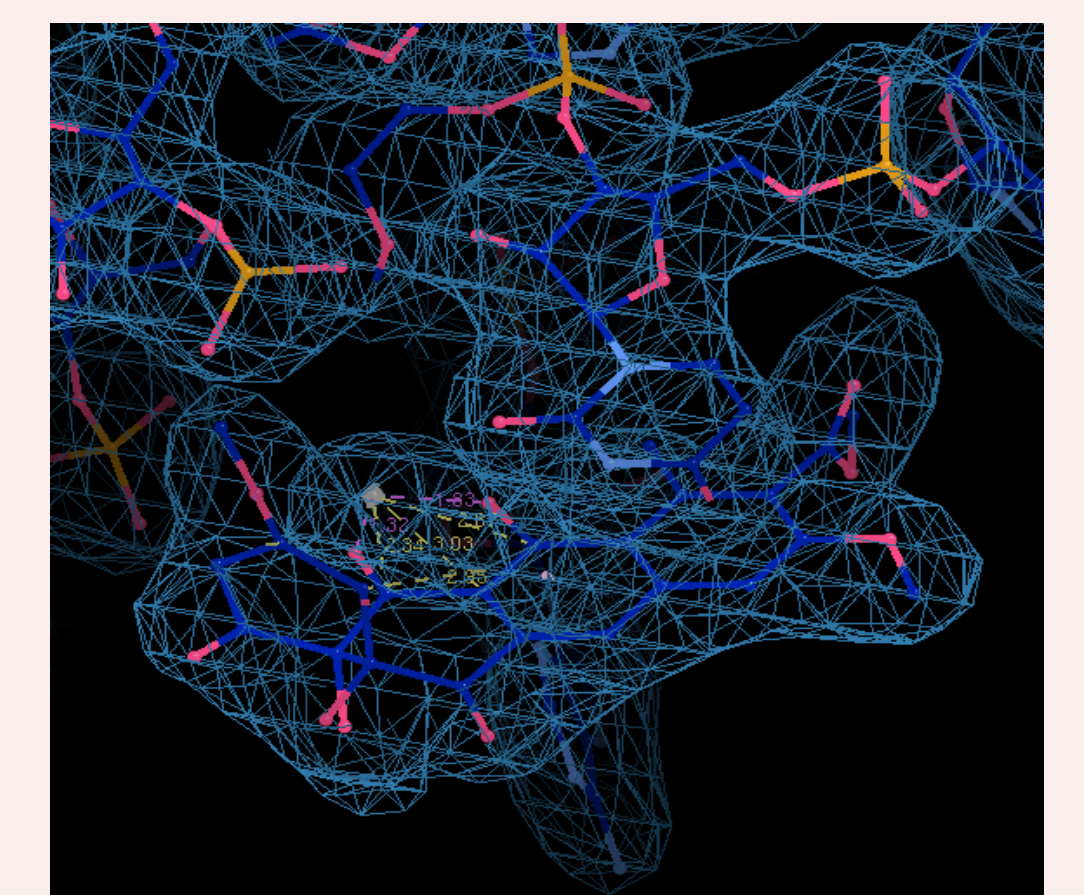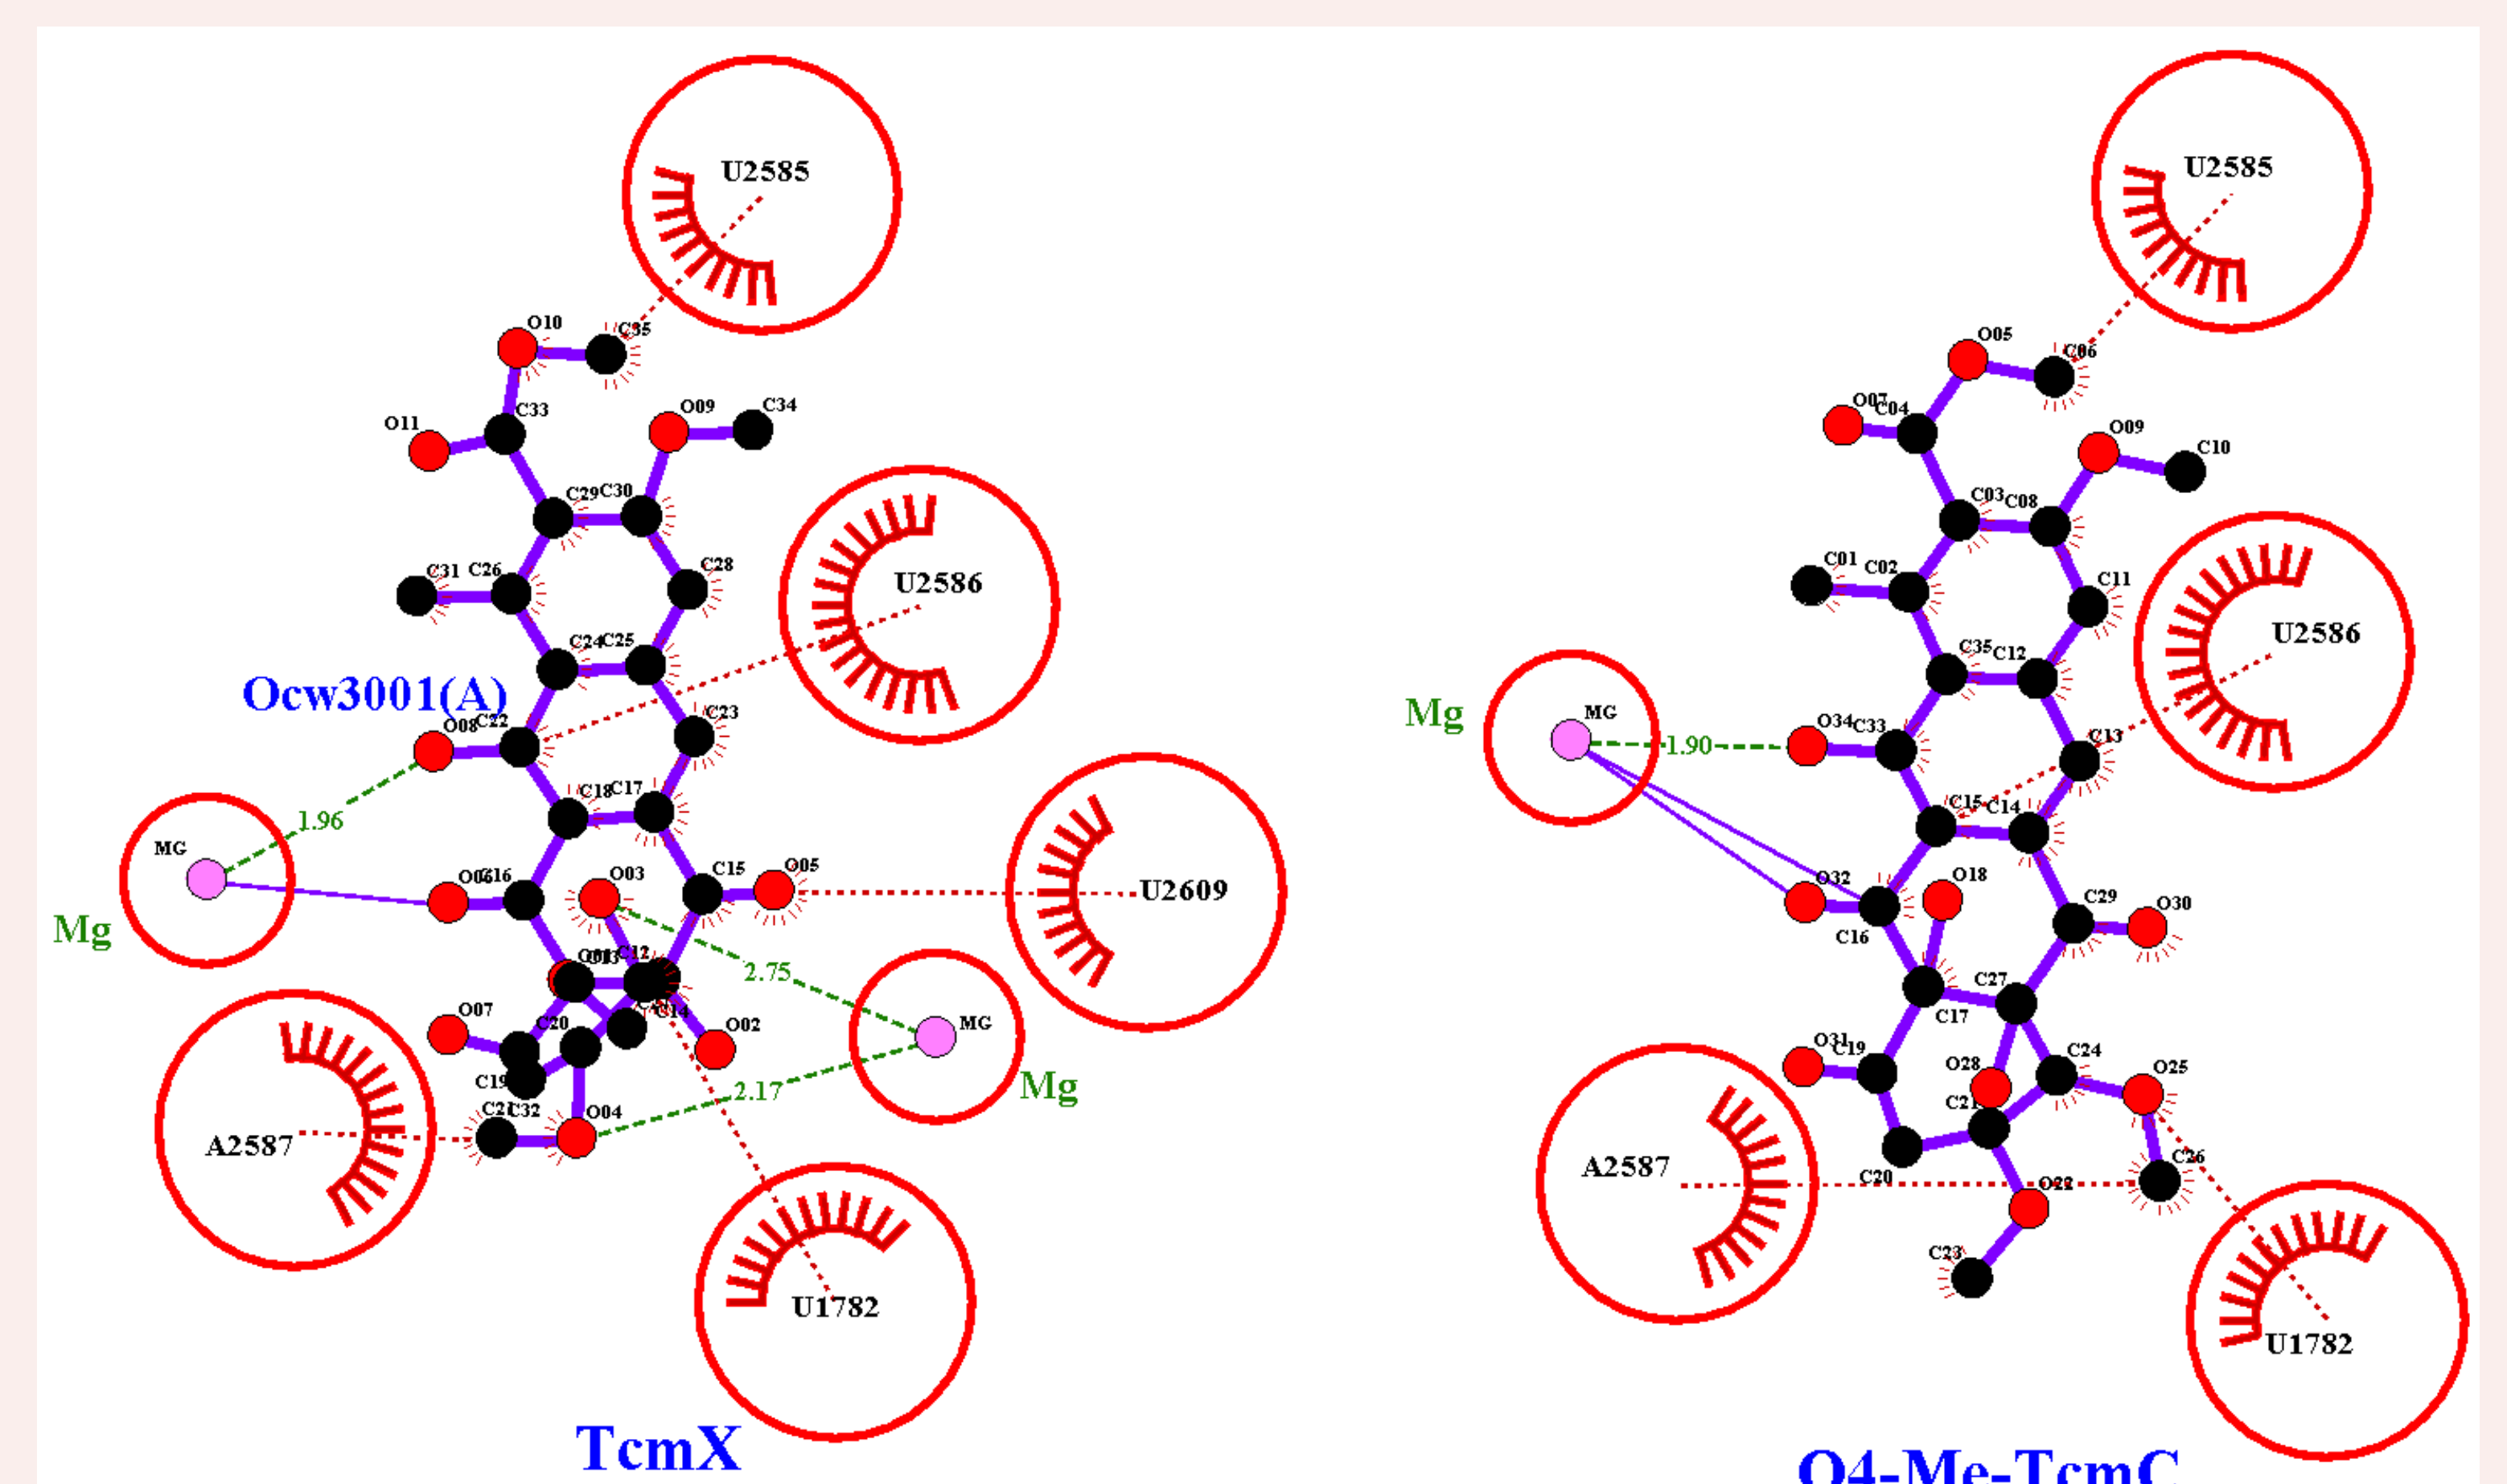

O<sup>4</sup>-Me-TcmC exhibits only a single coordination with magnesium.

Methylation in O<sup>4</sup> position prevents hydrogen bonding, further supporting the idea, that this site is **essential for the ribosome binding**
